1 **Can SARS-CoV-2 transmit from a dead body?**

2

3 Running title: Strategies for the handling of COVID dead bodies

4

5 Kiyoko Iwatsuki-Horimoto<sup>1</sup>, Hiroshi Ueki<sup>1, 2</sup>, Mutsumi Ito<sup>1</sup>, Sayaka Nagasawa<sup>3</sup>,

6 Yuichiro Hirata<sup>3,4</sup>, Kenichiro Hashizume<sup>5</sup>, Kazuho Ushiwata<sup>5</sup>, Hirotarō Iwase<sup>3,6</sup>,

7 Yohsuke Makino<sup>3,6</sup>, Tetsuo Ushiku<sup>7</sup>, Shinji Akitomi<sup>6,8</sup>, Masaki Imai<sup>1,2</sup>, Hisako Saitoh<sup>3</sup>,

8 Yoshihiro Kawaoka<sup>1,2,9\*</sup>

9

10 <sup>1</sup> Division of Virology, Institute of Medical Science, University of Tokyo, Minato-ku,  
11 Tokyo, 108-8639, Japan.

12 <sup>2</sup> The Research Center for Global Virus Diseases, National Center for Global Health and  
13 Medicine Research Institute, Shinjuku-ku, Tokyo 162-8655, Japan.

14 <sup>3</sup> Department of Legal Medicine, Graduate School of Medicine, Chiba University,  
15 Chuo-ku, Chiba 260-8670, Japan.

16 <sup>4</sup> Department of Pathology, National Institute of Infectious Diseases, Shinjuku-ku,  
17 Tokyo 162-8640, Japan.

18 <sup>5</sup> GSI Co., LTD, Chuo-ku, Tokyo 104-0033, Japan.

19 <sup>6</sup> Department of Forensic Medicine, Graduate School of Medicine, University of Tokyo,  
20 Tokyo, 113-0033, Japan.

21 <sup>7</sup> Department of Pathology, Graduate School of Medicine, University of Tokyo,  
22 Bunkyo-ku, Tokyo, 113-0033, Japan.

23 <sup>8</sup> Japan Medical Association Research Institute, Bunkyo-ku, Tokyo 113-8621, Japan.

24 <sup>9</sup> Influenza Research Institute, Department of Pathobiological Sciences, School of

25 Veterinary Medicine, University of Wisconsin-Madison, Madison, WI 53711, USA.

26

27 \*Corresponding author: e-mail, [kawaoka@ims.u-tokyo.ac.jp](mailto:kawaoka@ims.u-tokyo.ac.jp); tel, +81-3-5449-5504; fax,

28 +81-3-5449-5408.

29 **Abstract**

30 Although it has been 2.5 years since the COVID-19 pandemic began, the  
31 transmissibility of severe acute respiratory syndrome coronavirus 2 (SARS-CoV-2)  
32 from a dead infected body remains unclear, and often, in Japan bereaved family  
33 members are not allowed to view in-person a loved one who has died from COVID-19.  
34 In this study, we analyzed the possibility of SARS-CoV-2 transmission from a dead  
35 body by using the hamster model. We also analyzed the effect of Angel-care—in which  
36 the pharynx, nostril, and rectum are plugged—and embalming on reducing  
37 transmissibility from dead bodies. We found that SARS-CoV-2 could be transmitted  
38 from the body of animals that died within a few days of infection; however, Angel-care  
39 and embalming were effective in preventing transmission from the dead body. These  
40 results suggest that protection from infection is essential when in contact with a  
41 SARS-CoV-2-infected dead body, and that sealing the cavities of a dead body is an  
42 important infection control step if embalming is not done.

43

44 **Importance**

45 We found that SARS-CoV-2 could be transmitted from a dead body presumably via  
46 postmortem gases. However, we also found that postmortem care, such as plugging the

47 pharynx, nostrils, and rectum, or embalming could prevent transmission from the dead  
48 body. These results indicate that protection from infection is essential when handling  
49 infected corpses, and that appropriate care of SARS-CoV-2-infected corpses is  
50 important.

51

52 **Keywords**

53 SARS-CoV-2, COVID-19, dead body, transmission, embalming, animal model

54 **Introduction**

55 In July 2020, detailed procedures for the transportation, funeral, and cremation of those  
56 who died from COVID-19 were established by the federal government in Japan (1).

57 These guidelines offered several infection prevention and control strategies that  
58 included: recommending that the family members of the deceased refrain from touching  
59 or coming in close contact with the dead body to avoid the potential for infectious risks,

60 stating that the dead body must be contained and sealed in a non-permeable body bag  
61 and not opened, and recommending that cremation be performed within 24 hours,

62 although this was not mandatory. In fact, in most cases, the bereaved family members  
63 were not able to view their loved one in-person, and the cremains were given to the

64 families after the cremation had taken place. In May 2022, a guide to medical care  
65 issued by the Japanese government stated, "It is allowed for the bereaved family to see

66 the deceased face-to-face in an appropriately infection-controlled hospital room" (2).

67 However, to this day, many medical institutions still do not allow the bereaved family  
68 members to view their loved one who died from COVID-19.

69 There have been reports of infectious severe acute respiratory syndrome coronavirus 2  
70 (SARS-CoV-2) being detected in the bodies of those who died from COVID-19 (3-5);

71 however, it is not clear whether the virus can be transmitted from such bodies. In Japan,

72 the most common way nurses in hospitals care for dead bodies is to wipe the surface of  
73 the face, neck, hands, and feet with alcohol-soaked cotton, in addition to taking care of  
74 the appearance of the deceased by, for example, shaving them or applying cosmetics. In  
75 addition, the mouth, nose, ears, and anus are stuffed with cotton pads to prevent leakage  
76 of bodily fluids. This postmortem care of deceased individuals is known as “Angel-care”  
77 in Japan. Embalming, which is widely used in the US and Canada, has recently been on  
78 the rise in Japan. However, there are no reports of whether Angel-care or embalming  
79 reduces the infectivity of SARS-CoV-2 when applied to those who died as a result of  
80 COVID-19, and the actual infectivity of SARS-CoV-2 from an infected dead body is  
81 unknown. Accordingly, in this study, we analyzed the possibility of SARS-CoV-2  
82 transmission from dead bodies, and the effect of Angel-care and embalming on the  
83 transmissibility of SARS-CoV-2 from infected dead bodies by using a hamster model.

84 **Results**

85 **Transmissibility of SARS-CoV-2 from the dead body of an infected hamster.**

86 First, we assessed the transmissibility of SARS-CoV-2 from the dead body of an  
87 infected hamster. Six-month-old Syrian hamsters infected with  $10^3$  plaque-forming  
88 units (PFU) of SARS-CoV-2/UT-NCGM02/Human/2020 (Wuhan strain) were  
89 euthanized at 24 or 48 h post-infection with deep anesthesia and cervical dislocation. To  
90 disinfect viruses on the surface of the bodies, their entire bodies were immersed in an  
91 alcohol bath for 30 seconds (Fig. 1A). The bodies were then wrapped with wire net to  
92 prevent them from being cannibalized by cohousing hamsters. One wrapped body and  
93 two naïve hamsters were cohoused as one group in the same cage. As a control, one live  
94 infected hamster and two naïve hamsters was also cohoused (Fig. 1B). Two groups per  
95 condition were used for this study. Twenty-four hours after cohousing, the wrapped  
96 body and the live infected hamster were removed from the cages, and the organs of the  
97 dead body and euthanized-infected hamsters were collected for virus titration. The  
98 remaining naïve hamsters were euthanized three days after removal of the infected  
99 hamster, and their organs were collected for virus titration (Fig. 1B). For the live  
100 infected hamsters, high titers of virus were found in the lungs and nasal turbinates  
101 (Table 1). SARS-CoV-2 transmitted from all live infected hamsters under both

102 conditions of cohousing (i.e., cohoused at 24 and 48 hours post-infection). For the dead  
103 infected hamsters, at 24 hours postmortem, high titers of virus remained in the lungs  
104 and nasal turbinates. Moreover, SARS-CoV-2 transmitted from 1 of the 2 groups  
105 cohoused with the dead infected hamster under the condition of cohousing starting at 24  
106 but not at 48 hours post-infection. To confirm the transmissibility from the dead body,  
107 we examined an additional 8 groups under the condition of cohousing a dead infected  
108 hamster with naïve hamsters starting at 24 h post-infection. Among these 8 groups,  
109 SARS-CoV-2 transmitted from the dead body in 2 groups (Table 2). Therefore, in 3 out  
110 of 10 groups, SARS-CoV-2 transmitted from the dead infected hamster to naïve  
111 hamsters. These results indicate that SARS-CoV-2 can transmit from a dead infected  
112 body in the early stage of infection.

113

114 **Effect of Angel-care on the transmission of SARS-CoV-2 from the dead body of an**  
115 **infected hamster.**

116 We next examined the effectiveness of Angel-care in preventing transmission of  
117 SARS-CoV-2 from a dead hamster. Usually, in human Angel-care, the pharynx and  
118 nostrils are stuffed with moisture-absorbing gel and plugged with cotton, the rectum is  
119 stuffed with fiber and cotton, and the ears are stuffed with cotton only in order to



120 prevent leakage of bodily fluids. In this study, we used the same gel that is used for  
121 human Angel-care in the hamster's mouth and then plugged it with cotton. Since  
122 hamsters' nostrils and rectum are too small to perform the procedure done in humans,  
123 we used medical grade Aron Alpha<sup>®</sup> to plug these sites. No treatment was given to the  
124 ears. One wire-wrapped Angel-cared SARS-CoV-2-infected body and two naïve  
125 hamsters were considered as one group, and we examined 10 groups. High titers of  
126 viruses were still detected in the lungs and nasal turbinates of the Angel-cared body;  
127 however, SARS-CoV-2 did not transmit from the body to any of the naïve hamsters in  
128 any of the groups (Table 3). This result indicates that Angel-care was effective in  
129 preventing SARS-CoV-2 transmission from a dead body.

130

131 **Effect of embalming on the transmission of SARS-CoV-2 from the dead body of an**  
132 **infected hamster.**

133 Finally, we examined the effectiveness of embalming on preventing transmission.  
134 Embalming agents, the same as those used in humans, were injected through the apex of  
135 the heart, and blood was drained through the inguinal transvenous vein. The incision  
136 was sutured with a medical stapler. One wire-wrapped embalmed body and two naïve  
137 hamsters were considered as one group, and we examined 10 groups. The virus titer of

138 the embalmed body could not be determined because of the toxicity of the  
139 formaldehyde to the cultured cells used for virus titration. SARS-CoV-2 did not transmit  
140 from the embalmed body to any of the naïve hamsters in any group. This result indicates  
141 that embalming was effective in preventing SARS-CoV-2 transmissions from a dead  
142 body.

143 **Discussion**

144 In this study, we demonstrated that SARS-CoV-2 could be transmitted from a dead body  
145 to live animals in the hamster model. Sub-genomic RNA, indicating viral replication of  
146 SARS-CoV-2, has been detected in specimens collected from the dead bodies of  
147 COVID-19 patients at 35.8 h postmortem (3). Another study reported that infectious  
148 viruses were isolated from the lungs of two COVID-19 corpses at 4 and 17 days  
149 postmortem, respectively (4). In yet another study, it was reported that of 128  
150 SARS-CoV-2 RNA-positive corpses, 20% still retained infectious viruses up to 14 days  
151 postmortem (5). Collectively, these results demonstrate that infectious viruses remain in  
152 corpses. Within a few hours of death, a dead body begins to retain postmortem gases in  
153 the gastrointestinal tract (6). In this study, we confirmed that Angel-care, during which  
154 the pharynx, nostril, and rectum are plugged, was effective in preventing leakage of gas  
155 containing SARS-CoV-2 from a dead hamster in addition to preventing leakage of  
156 bodily fluids. Therefore, it is possible that infectious viruses are transmitted via the  
157 postmortem gases produced by the decomposition process or other postmortem changes  
158 in the dead body.

159 Rodic et al. reported that COVID-19 nucleic acids were identified from the lungs of  
160 embalmed corpses (7). However, viral RNA detection does not distinguish between

161 viable and dead viruses (5, 8, 9). A persistently positive RT-PCR does not indicate  
162 whether infectious virus is still present in a person's body. SARS-CoV-2 RNA can be  
163 detected beyond the infectious period (5, 8). Therefore, detection of viral RNA does not  
164 necessarily indicate infectivity. It is known that formaldehyde and glutaraldehyde  
165 inactivate SARS-CoV-2 (10, 11). The embalming agent used in this study contains 7%  
166 formaldehyde and 4% glutaraldehyde. Therefore, most of the virus in the dead body was  
167 likely inactivated by these chemicals. In addition, embalming is a process that prevents  
168 decomposition and the formation of postmortem gases. Both functions may have  
169 prevented the transmission of SARS-CoV-2 from the dead body.

170 In this study, we found that SARS-CoV-2 could be transmitted from a dead body  
171 presumably by postmortem gases. However, we also found that Angel-care or  
172 embalming could prevent transmission from the dead body. These results indicate that  
173 protection from infection is essential when handling infected corpses, and that  
174 appropriate treatment of SARS-CoV-2-infected corpses is important.

175 **Materials and Methods**

176 **Cells and Virus.** VeroE6/TMPRSS2 (12) (JCRB 1819) cells were propagated in  
177 Dulbecco's Modified Eagle Medium (DMEM) containing 10% FCS, 1 mg/ml geneticin  
178 (G418; Invivogen), and 5 µg/ml plasmocin prophylactic (Invivogen).  
179 VeroE6/TMPRSS2 cells were incubated at 37 °C with 5% CO<sub>2</sub>, and regularly tested for  
180 mycoplasma contamination by using PCR and were confirmed to be mycoplasma-free.  
181 SARS-CoV-2/UT-NCGM02/Human/2020 (Wuhan strain) was propagated in  
182 VeroE6/TMPRSS2 cells in VP-SFM (Thermo Fisher Scientific).  
183 All experiments with SARS-CoV-2 were performed in enhanced biosafety level 3  
184 (BSL3) containment laboratories at the University of Tokyo, which are approved for  
185 such use by the Ministry of Agriculture, Forestry, and Fisheries, Japan.

186 **Experimental infection.**

187 Six-month-old male Syrian hamsters (Japan SLC Inc., Shizuoka, Japan) were used for  
188 this study. Under ketamine–xylazine anesthesia, hamsters were inoculated with 10<sup>3</sup> PFU  
189 (in 100 µl) of SARS-CoV-2 via the intranasal route. At 24 or 48 h post-infection, the  
190 hamsters were euthanized with deep anesthesia and cervical dislocation. To disinfect  
191 viruses on the surface of the bodies, the entire bodies were immersed in an alcohol bath  
192 for 30 s. The bodies were then wrapped with wire net to prevent them from being  
193 cannibalized by cohousing hamsters (Fig 1A). One wrapped body and two naïve  
194 hamsters were cohoused as one group in the same cage. As a control, one live infected  
195 hamster and two naïve hamsters was also cohoused (Fig 1B). Twenty-four hours after  
196 cohousing, the wrapped body and the live infected hamster were removed from the  
197 cages, and the lungs and nasal turbinates were collected for virus titration. The  
198 remaining naïve hamsters were euthanized three days after removal of the infected

199 hamster, and their organs were collected for virus titration. The animal room was kept at  
200 25°C and 50% humidity.

201 Angel-care: alcohol-dipped bodies were used for Angel-care. Three hundred microliters  
202 of jelly for human Angel-care (Humex Co., Ltd, Japan) was inserted into the mouth and  
203 plugged with cotton; nostrils and rectum were plugged with medical grade Aron  
204 Alpha®.

205 Embalming: alcohol-dipped bodies were used for embalming. The heart was exposed,  
206 and embalming agents (The Dodge Company, USA) were injected through the apex of  
207 the heart. The inguinal vein was exposed and blood was drained through it. The wound  
208 was sutured with a medical stapler.

209 **Plaque Assay.** Lungs and nasal turbinates were homogenized in 1.0 ml of growth  
210 medium, and clarified by centrifugation (1,000 g for 5 min). Confluent monolayers of  
211 VeroE6/TMPRSS2 cells were infected with 100 µl of undiluted or 10-fold dilutions  
212 ( $10^{-1}$  to  $10^{-5}$ ) of homogenates, and incubated for 1 h at 37°C. After the inoculum was  
213 removed, the cells were washed with growth medium and overlaid with a 1:1 mixture  
214 of 2x growth medium and 2% agarose. Plates were incubated at 37°C for 48 h before  
215 virus plaques were counted.

216 **Ethics statements.** The research protocol for the animal studies is in accordance with  
217 the Regulations for Animal Care at the University of Tokyo, Tokyo, Japan, and was  
218 approved by the Animal Experiment Committee of the Institute of Medical Science, the  
219 University of Tokyo (approval number: PA20-30).

220 **Acknowledgments**

221 We thank Susan Watson for editing the manuscript, Satoshi Kamakura, Ryuta Uraki,  
222 Moe Okuda, Kyoko Yokota, Mikuru Sato, Kengo Kajiyama, and Kyoko Tada at  
223 University of Tokyo for technical support, and Rintaro Sawa at Japan Medical  
224 Association Research Institute for useful advice.

225

226 **Author Contributions**

227 K.I-H., H.U., S.N., Y.H., K.H., H.I., Y.M., T.U., S.A., M.Imai, H.S., and Y.K. designed  
228 experiments; K.I-H., H.U., M.Ito, and M.Imai, performed the experiments; and K.I-H.,  
229 H.U., K.H., H.S., and Y.K. wrote the manuscript.

230

231 **Funding information**

232 This work was supported by the Japan Program for Infectious Diseases Research and  
233 Infrastructure (JP22wm0125002) from the Japan Agency for Medical Research and  
234 Development (AMED), and Research on Evaluation of the Infectivity of coronavirus  
235 disease-2019 in Human Remains (20HA2008) from the Health, Labour, and Welfare  
236 Administration's Research Grant for the Promotion of Emerging and Re-emerging  
237 Infectious Diseases and Immunization Policy in 2020 and 2021.

238

239 **Conflict of interest statement**

240 K.H., and K.U. are employed by GSI Co., LTD.

241 The other authors declare no competing financial interests.

242 **Figure legend**

243 **Fig 1. Schematic representation of the treatment of the dead body.** (A) Syrian  
244 hamsters were euthanized at 24 or 48 hours post-infection with deep anesthesia and  
245 cervical dislocation. To disinfect viruses on the surface of the bodies, the entire bodies  
246 were immersed in an alcohol bath for 30 seconds. The bodies were then wrapped with  
247 wire net to prevent them from being cannibalized by the cohousing hamsters. (B) One  
248 wrapped body and two naïve hamsters were cohoused as one group in the same cage. As  
249 a control, one live infected hamster and two naïve hamsters was also cohoused.  
250 Twenty-four hours after cohousing, the wrapped body and the live infected hamster  
251 were removed from the cages, and the organs of the dead body and euthanized-infected  
252 hamsters were collected for virus titration. The remaining naïve hamsters were  
253 euthanized three days after removal of the infected hamster, and their organs were  
254 collected for virus titration.



255 **References**

- 256 1. **Ministry of Health, Labour and Welfare, Japan,, Ministry of Economy,**  
257 **Trade and Industry, Japan.** July 29, 2020. Guidelines for the treatment,  
258 transport, funeral, cremation, etc. of persons who have died or are suspected to  
259 have died from novel coronavirus infection (Japanese).  
260 <https://www.mhlw.go.jp/content/000653447.pdf>. Accessed July 22.
- 261 2. **Ministry of Health, Labour and Welfare, Japan.** May 9, 2022. A guide to  
262 medical care of COVID-19 (Japanese).  
263 <https://www.mhlw.go.jp/content/000936655.pdf>. Accessed July 22.
- 264 3. **Heinrich F, Meißner K, Langenwalder F, Püschel K, Nörz D, Hoffmann A,**  
265 **Lütgehetmann M, Aepfelbacher M, Bibiza-Freiwald E, Pfefferle S,**  
266 **Heinemann A.** 2021. Postmortem Stability of SARS-CoV-2 in Nasopharyngeal  
267 Mucosa. *Emerg Infect Dis* **27**:329-331.
- 268 4. **Plenzig S, Bojkova D, Held H, Berger A, Holz F, Cinatl J, Gradhand E,**  
269 **Kettner M, Pfeiffer A, Verhoff MA, Ciesek S.** 2021. Infectivity of deceased  
270 COVID-19 patients. *Int J Legal Med* **135**:2055-2060.
- 271 5. **Heinrich F, Schröder AS, Gerberding AL, Gerling M, Langenwalder F,**  
272 **Lange P, Heinemann A, Bibiza-Freiwald E, Nörz DS, Aepfelbacher M,**  
273 **Pfefferle S, Ondruschka B, Lütgehetmann M.** 2022. Postmortem  
274 Antigen-Detecting Rapid Diagnostic Tests to Predict Infectivity of  
275 SARS-CoV-2-Associated Deaths. *Emerg Infect Dis* **28**:244-247.
- 276 6. **Saukko P, Knight B.** 2015. The pathophysiology of death, p 55-93, Knight's  
277 Forensic Pathology. CRC Press, London.
- 278 7. **Rodic N, Tahir M.** 2021. Positive Postmortem Test for SARS-CoV-2 Following  
279 Embalming in Confirmed COVID-19 Autopsy. *Am J Clin Pathol* **155**:318-320.
- 280 8. **Bullard J, Dust K, Funk D, Strong JE, Alexander D, Garnett L, Boodman C,**  
281 **Bello A, Hedley A, Schiffman Z, Doan K, Bastien N, Li Y, Van Caesele PG,**  
282 **Poliquin G.** 2020. Predicting Infectious Severe Acute Respiratory Syndrome  
283 Coronavirus 2 From Diagnostic Samples. *Clin Infect Dis* **71**:2663-2666.
- 284 9. **Wölfel R, Corman VM, Guggemos W, Seilmaier M, Zange S, Müller MA,**  
285 **Niemeyer D, Jones TC, Vollmar P, Rothe C, Hoelscher M, Bleicker T,**  
286 **Brünink S, Schneider J, Ehmann R, Zwirgmaier K, Drosten C, Wendtner**  
287 **C.** 2020. Virological assessment of hospitalized patients with COVID-2019.  
288 *Nature* **581**:465-469.
- 289 10. **Kwok CS, Dashti M, Tafuro J, Nasiri M, Muntean EA, Wong N, Kemp T,**  
290 **Hills G, Mallen CD.** 2021. Methods to disinfect and decontaminate

- 291 SARS-CoV-2: a systematic review of in vitro studies. *Ther Adv Infect Dis*  
292 **8**:2049936121998548.
- 293 11. **Fadaei A.** 2021. Viral Inactivation with Emphasis on SARS-CoV-2 Using  
294 Physical and Chemical Disinfectants. *ScientificWorldJournal* **2021**:9342748.
- 295 12. **Matsuyama S, Nao N, Shirato K, Kawase M, Saito S, Takayama I, Nagata N,**  
296 **Sekizuka T, Katoh H, Kato F, Sakata M, Tahara M, Kutsuna S, Ohmagari**  
297 **N, Kuroda M, Suzuki T, Kageyama T, Takeda M.** 2020. Enhanced isolation of  
298 SARS-CoV-2 by TMPRSS2-expressing cells. *Proc Natl Acad Sci U S A*  
299 **117**:7001-7003.  
300

Table 1. Transmissibility of SARS-CoV-2 from live animals and dead bodies.

| Condition of infected animals |              |       | Virus titers ( $\log_{10}$ PFU) in: |                 |                |      |         |      |
|-------------------------------|--------------|-------|-------------------------------------|-----------------|----------------|------|---------|------|
|                               |              |       | Infected                            |                 | Naive 1        |      | Naive 2 |      |
| Timing of cohousing:          | Live or dead | Group | Lung                                | NT <sup>1</sup> | Lung           | NT   | Lung    | NT   |
| 24 h post-infection           | live         | #1    | 8.49                                | 9.36            | 8.45           | 8.58 | 8.27    | 8.30 |
|                               |              | #2    | 8.74                                | 9.26            | 8.12           | 8.43 | 8.38    | 8.80 |
|                               | dead         | #1    | 7.72                                | 8.42            | 7.32           | 7.26 | 1.84    | -    |
|                               |              | #2    | 7.74                                | 6.42            | - <sup>2</sup> | -    | -       | -    |
| 48 h post-infection           | live         | #1    | 8.29                                | 8.44            | 5.22           | 7.07 | 7.05    | 8.90 |
|                               |              | #2    | 8.17                                | 8.68            | 8.41           | 8.90 | 8.32    | 8.93 |
|                               | dead         | #1    | 8.15                                | 8.43            | -              | -    | -       | -    |
|                               |              | #2    | 8.04                                | 8.69            | -              | -    | -       | -    |

Six-month-old Syrian hamsters infected with  $10^3$  PFU of SARS-CoV-2 strain NCGM02 were euthanized at 24 or 48 h post-infection with deep anesthesia and cervical dislocation. One wrapped body or one live infected hamster and two naïve hamsters were cohoused as one group in the same cage. Two groups per condition were used for this study. Twenty-four hours after cohousing, the wrapped body and the live infected hamster were removed from the cage, and the organs of the dead body and euthanized-infected hamsters were collected for virus titration. The remaining naïve hamsters were euthanized three days after removal of the infected hamster, and their organs were collected for virus titration.

1: NT, nasal turbinate

2: -, virus not detected (detection limit:  $1.0 \log_{10}$  PFU/ml)

Table 2. Transmissibility of SARS-CoV-2 from dead bodies.

| Condition of infected animals |              |       | Virus titers (log <sub>10</sub> PFU) in: |                 |                |      |         |      |
|-------------------------------|--------------|-------|------------------------------------------|-----------------|----------------|------|---------|------|
|                               |              |       | Infected                                 |                 | Naive 1        |      | Naive 2 |      |
| Timing of cohousing:          | Live or dead | Group | Lung                                     | NT <sup>1</sup> | Lung           | NT   | Lung    | NT   |
| 24 h post-infection           | dead         | #3    | 7.63                                     | 8.79            | - <sup>2</sup> | -    | -       | -    |
|                               |              | #4    | 7.97                                     | 8.84            | -              | -    | -       | -    |
|                               |              | #5    | 7.77                                     | 6.23            | -              | -    | -       | -    |
|                               |              | #6    | 7.58                                     | 8.33            | -              | -    | -       | -    |
|                               |              | #7    | 7.95                                     | 8.70            | 7.54           | >8.0 | 8.18    | >8.0 |
|                               |              | #8    | 7.75                                     | 8.47            | 2.50           | 2.61 | 1.90    | 2.16 |
|                               |              | #9    | 7.61                                     | 6.21            | -              | -    | -       | -    |
|                               |              | #10   | 7.65                                     | 7.62            | -              | -    | -       | -    |

Six-month-old Syrian hamsters infected with 10<sup>3</sup> PFU of SARS-CoV-2 strain NCGM02 were euthanized at 24 hours post-infection with deep anesthesia and cervical dislocation. One wrapped body and two naïve hamsters were cohoused as one group in the same cage. Eight groups were used for this study. Twenty-four hours after cohousing, the wrapped body was removed from the cage, and the lungs and nasal turbinates were collected for virus titration. The remaining naïve hamsters were euthanized three days after removal of the body, and their collected lungs and nasal turbinates were collected for virus titration.

1: NT, nasal turbinate

2: -, virus not detected (detection limit: 1.0 log<sub>10</sub> PFU/ml)

Table 3. Effect of Angel-care on virus transmission from a dead body.

| Condition of infected animals |            |       | Virus titers ( $\log_{10}$ PFU) in: |                 |                |    |         |    |
|-------------------------------|------------|-------|-------------------------------------|-----------------|----------------|----|---------|----|
|                               |            |       | Infected                            |                 | Naive 1        |    | Naive 2 |    |
| Timing of cohousing:          | Treatment  | Group | Lung                                | NT <sup>1</sup> | Lung           | NT | Lung    | NT |
| 24 h post-infection           | Angel-care | #1    | 7.84                                | 7.66            | - <sup>2</sup> | -  | -       | -  |
|                               |            | #2    | 7.86                                | 8.02            | -              | -  | -       | -  |
|                               |            | #3    | 7.55                                | 8.56            | -              | -  | -       | -  |
|                               |            | #4    | 7.54                                | 8.67            | -              | -  | -       | -  |
|                               |            | #5    | 7.75                                | 7.80            | -              | -  | -       | -  |
|                               |            | #6    | 7.56                                | 7.45            | -              | -  | -       | -  |
|                               |            | #7    | 2.60                                | 6.85            | -              | -  | -       | -  |
|                               |            | #8    | 7.82                                | 8.97            | -              | -  | -       | -  |
|                               |            | #9    | 7.28                                | 6.95            | -              | -  | -       | -  |
|                               |            | #10   | 7.03                                | 7.42            | -              | -  | -       | -  |

Six-month-old Syrian hamsters infected with  $10^3$  PFU of SARS-CoV-2 strain NCGM02 were euthanized at 24 hours post-infection with deep anesthesia and cervical dislocation. Alcohol-dipped bodies were used for Angel-care. Three hundred microliters of the gel was inserted into the mouth, which was then plugged with cotton; the nostrils and rectum were plugged with medical grade Aron Alpha®. One wrapped body and two naïve hamsters were cohoused as one group in the same cage. Eight groups were used for this study. Twenty-four hours after cohousing, the wrapped body was removed from the cage, and the organs were collected for virus titration. The remaining naïve hamsters were euthanized three days after removal of the body, and their organs were collected for virus titration.

1: NT, nasal turbinate

2: -, virus not detected (detection limit:  $1.0 \log_{10}$  PFU/ml)

A

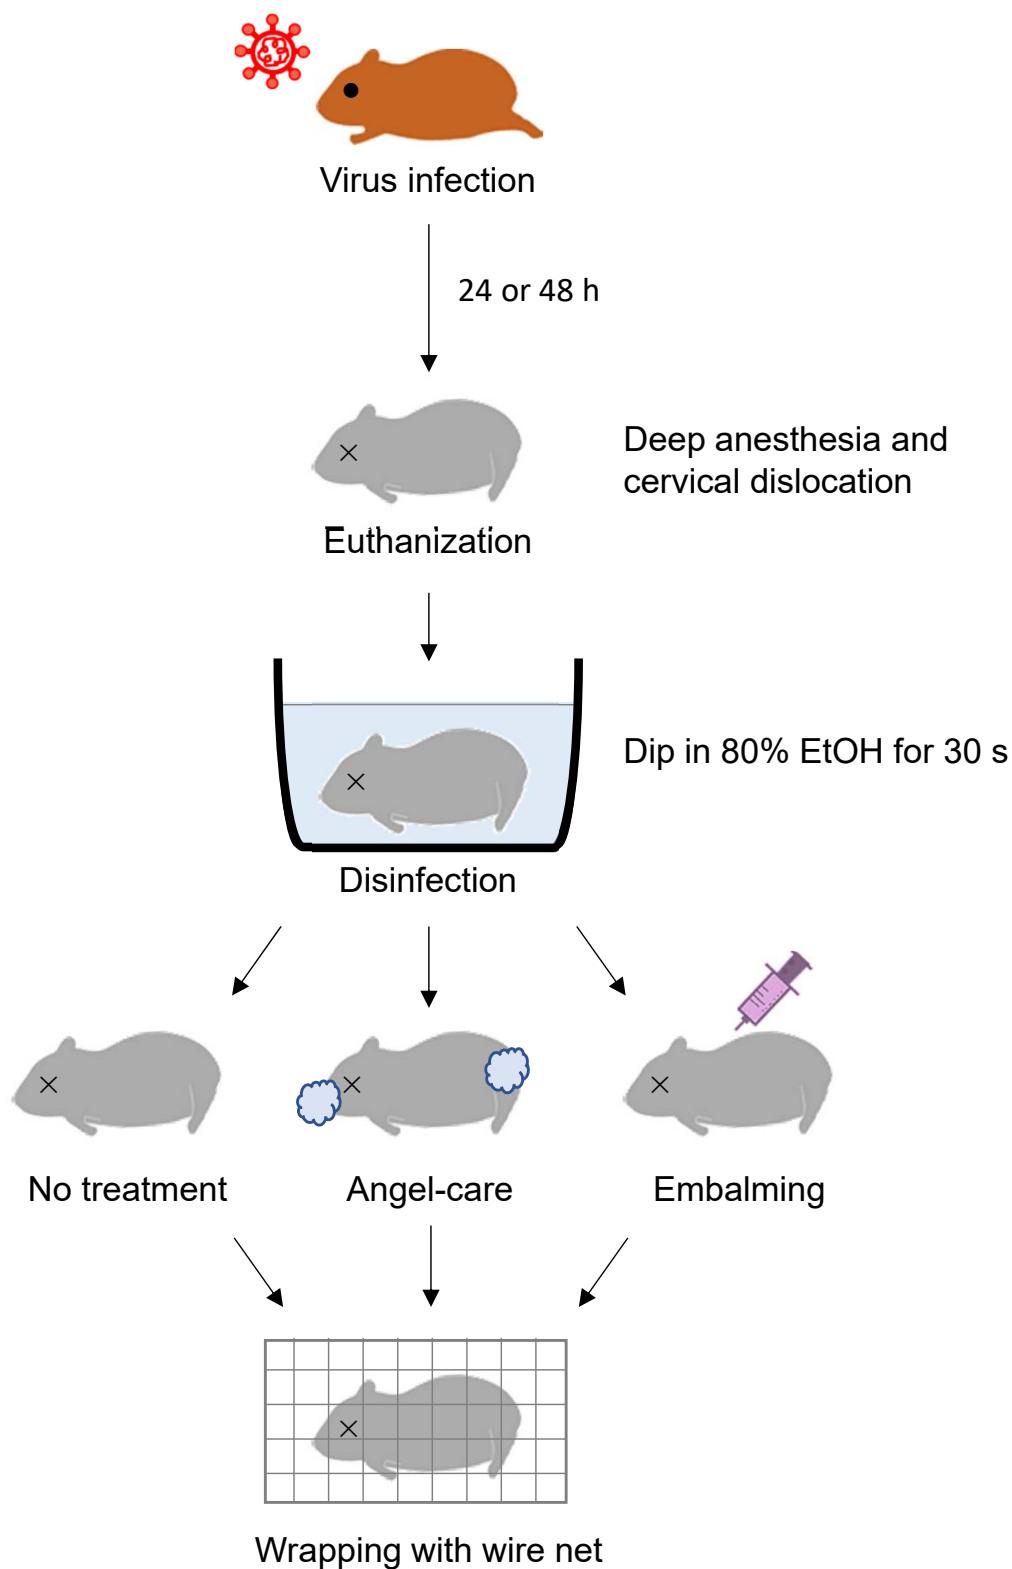

Fig 1. Iwatsuki-Horimoto et al.

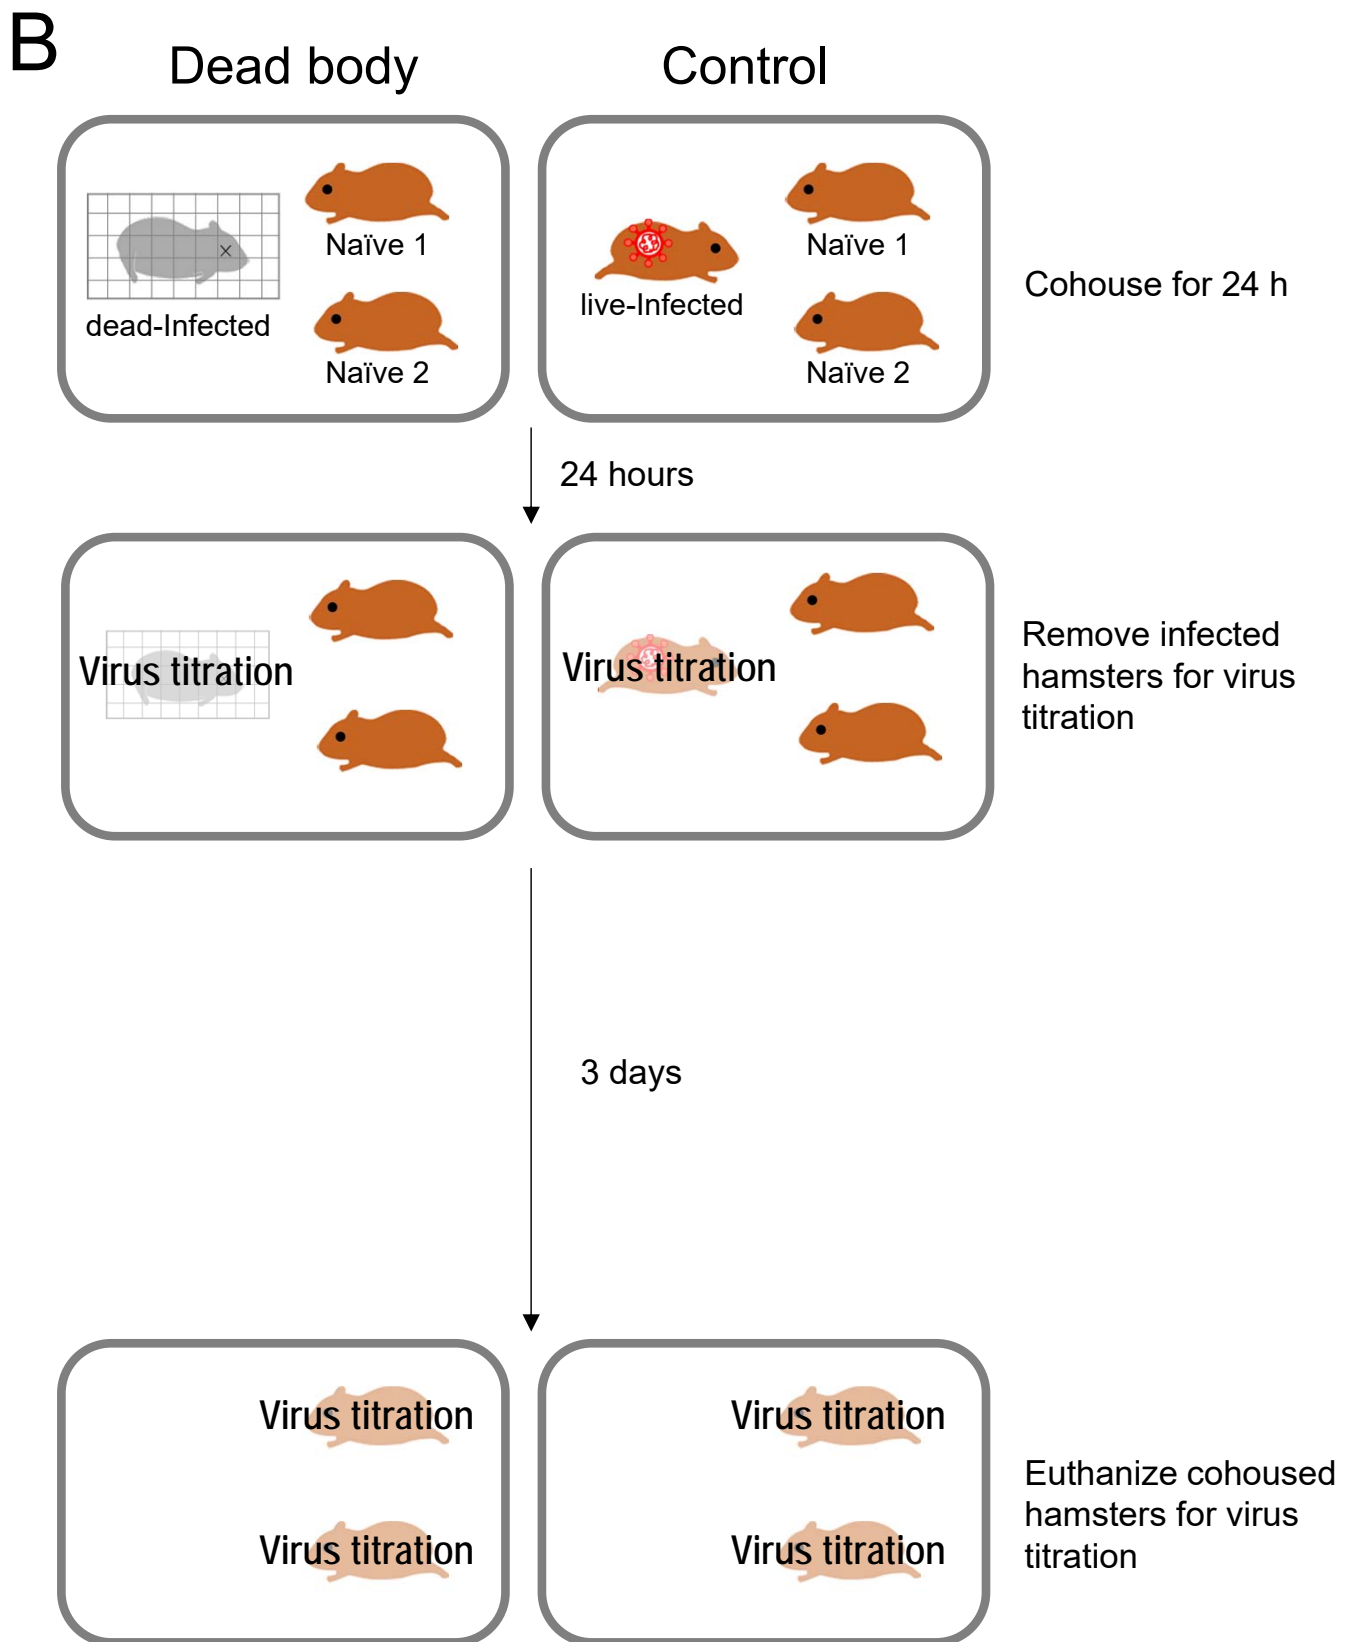

Fig 1. Iwatsuki-Horimoto et al.
